# Supplementary material for: Genome-wide exploration and characterization of miR172/euAP2 genes in Brassica napus L. for likely role in flower organ development
Source: BMC Plant Biol. 2019 Aug 1;19:336. doi: 10.1186/s12870-019-1936-2 (PMC6676641; doi:10.1186/s12870-019-1936-2)
Supplement: Supplementary file 7 — : Table S7 Primers used for qRT-PCR of euAP2 genes in B.napus (XLSX 10 kb) [file 12870_2019_1936_MOESM7_ESM.xlsx]

## Sheet: Sheet1
Table S7. Primers for qRT-PCR of euAP2 genes in B.napus.
genes	Primer sequence（ 5' - 3’ ）
	Forward primer	Reverse primer
BnaActin7	TGGGTTTGCTGGTGACGAT	TGCCTAGGACGACCAACAATACT
BnaAP2-1-5	TGGCGGAGGAGGCTTCTCACTA	TGATGAGAAGTAGAAGTGGAATTAAA
BnaAP2-2-4	CCGAGAACCACCAGTTTGAA	CTGATTGTGATTATGAGGAGAGAA
BnaTOE1-4	CTGACGCAGATGAAGATTCTTG	CGGGAAAAACTCTTTAGTCACG
BnaTOE1-1-3	TAATCAATGCAGATGCAGACGACGA	CCTGGAAAAACTCCTTGGTAACGCC
BnaTOE1-2-5	TCCTTATCGTTCATCGGACCATCGC	TCCCTCCTCCTTCACCTTCACTTCT
BnaTOE2-1	GACATGTGATACGCCTTTCAAT	GCGACATAAAACCTTTCTCTGG
BnaTOE2-2	CGAGGGAGGGTTTTATGCCAGG	GCCGTTCCACCACTGGGCTGAT
BnaTOE2-3	CGAGAAGATGATGAAGGAAGAAGTG	ATCACCCTCGCAGCGTCTC
BnaTOE3-1-2	ACGGTGTAGGATAGCGAGTGGGAAT	AGGGACGAAAGAAGTGGAAGGTGC
BnaSMZ-1-3	ATAAACCTGACAACAAGCGACTACT	ATGTGGTCGTGGTGATAAAAGG
BnaSMZ-2	CTCAAGCAAGCAGTAGGTCTTTTCC	TGTAACGACGACACATTCAACCAGT
